# Supplementary material
Source: Springer Nature journal article supplement (https://www.springermedizin.de/resource/supplementary/12958_2014_1280_MOESM2_ESM.pdf/9566962)

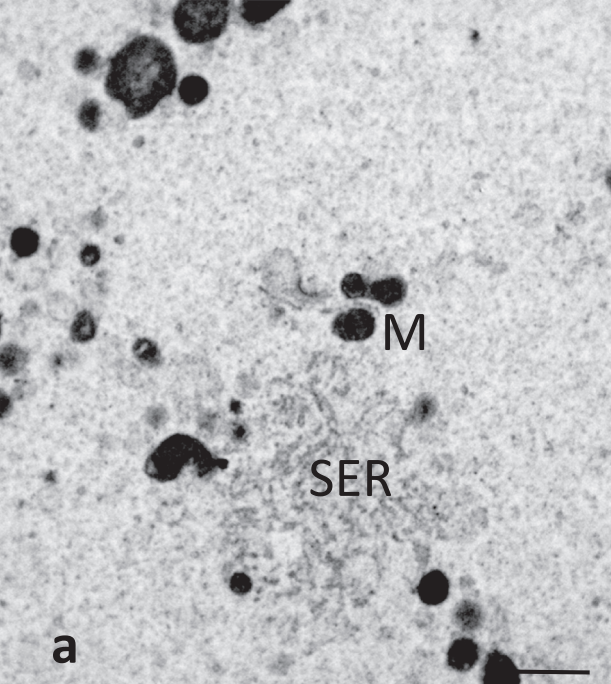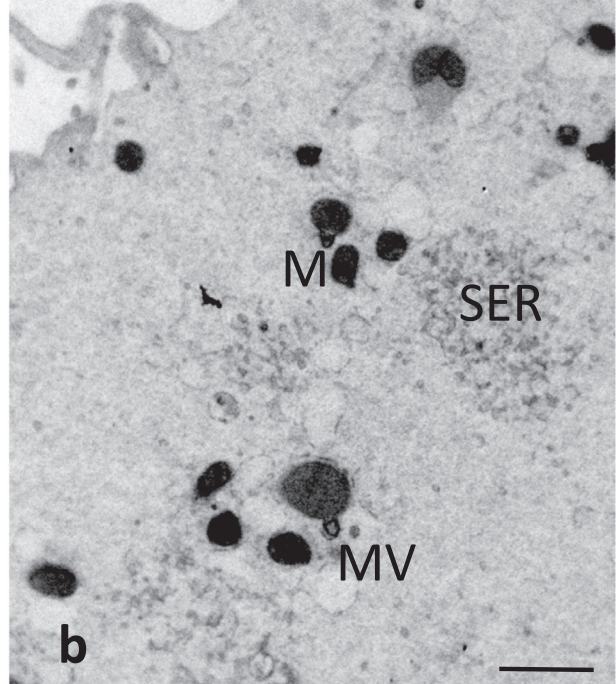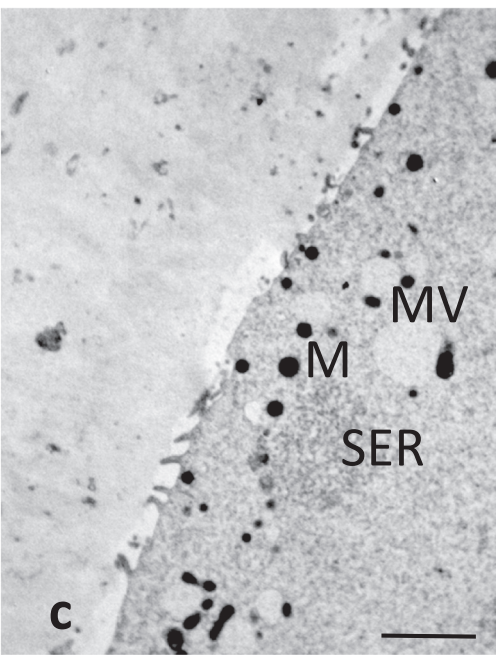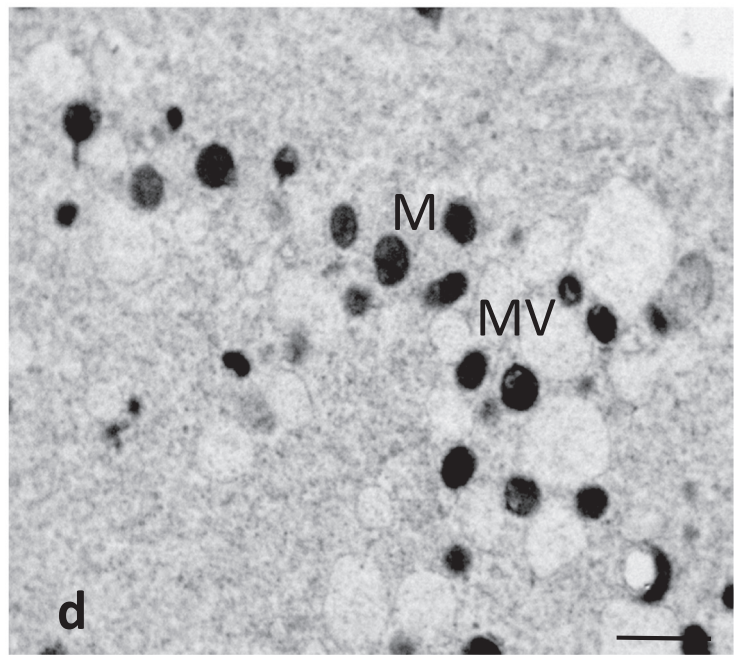

Supplement: MOESM2 [file 9566962]
